# Supplementary material
Source: publisher figshare collection journal article supplement (https://gsajournals.figshare.com/articles/dataset/_/27682254)
Supplement: Supplementary file 1 [file 1]

# Supplementary information

## Supplementary Figures

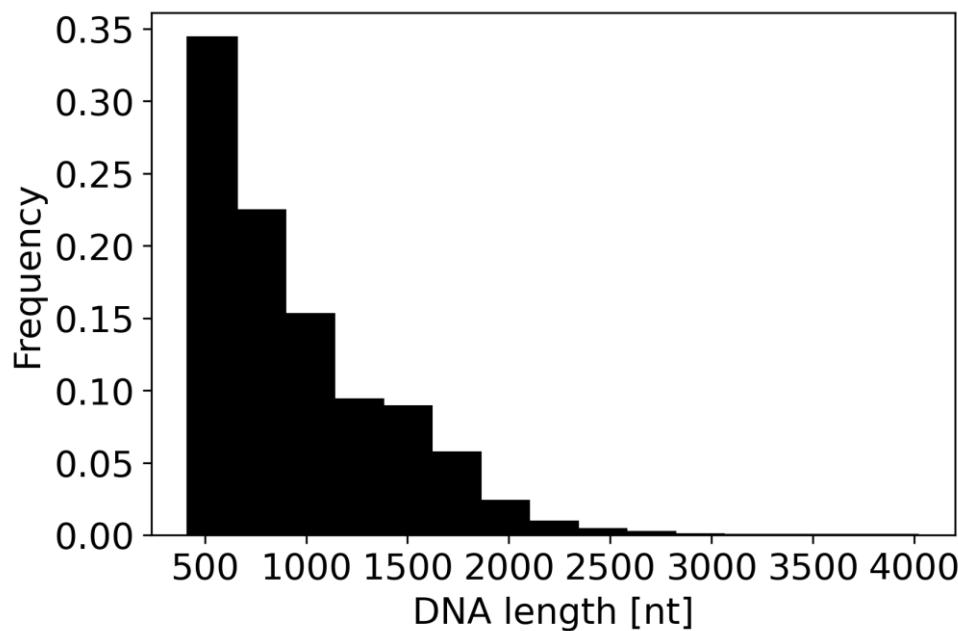

Supplementary Figure 1. Distribution of lengths of DNA inserts for tagging or deleting S288C genes designed by PIPOLine with default parameters. For tagging, the length of the insert does not include the tag nor the linker, which the user needs to choose (and ensure compatibility with restriction sites in the plasmid).

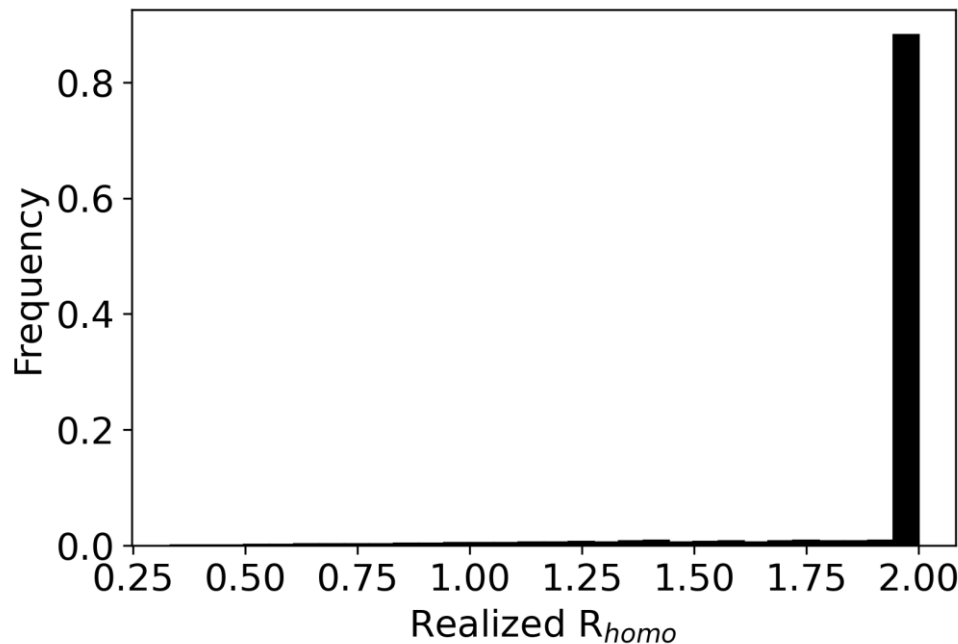

Supplementary Figure 2. Distribution of realized  $R_{homo}$  parameters for tagging or deleting all S288C genes when using the default input value of 2 for  $R_{homo}$ . The realized  $R_{homo}$  can be smaller than the desired  $R_{homo}$  if the rules for PIPOLine cannot be satisfied otherwise. The average  $R_{homo}$  is  $(1.93 \pm 0.22 \text{ STD})$ .

## Supplementary Note 1: List of PIPOLine input parameters

| Argument        | Description                                                                                                                                                                                                                                    | Default Value                                                                   |
|-----------------|------------------------------------------------------------------------------------------------------------------------------------------------------------------------------------------------------------------------------------------------|---------------------------------------------------------------------------------|
| --backbone_path | Plasmid backbone used for PIPO                                                                                                                                                                                                                 | './Test_examples/pETUL_backbone.fsa'                                            |
| --MCS_start_ind | Starting nucleotide of the multiple cloning site sequence (1-based counting)                                                                                                                                                                   | 1                                                                               |
| --MCS_end_ind   | Ending nucleotide of the multiple cloning site sequence (1-based counting)                                                                                                                                                                     | 108                                                                             |
| --min_homology  | Minimal length of DNA sequence used for homologous recombination during pop-in                                                                                                                                                                 | 70                                                                              |
| --R             | Ratio between DNA sequence length used for pop-out vs. pop-in                                                                                                                                                                                  | 2                                                                               |
| --Gene_path     | ORF of the gene with 1000 bp upstream and downstream (in FASTA format)                                                                                                                                                                         | './Test_examples/CLB2_3p_labeling/CLB2_pm_1000.fsa'                             |
| --linker_path   | Linker                                                                                                                                                                                                                                         | './Test_examples/long_linker.fsa'                                               |
| --modality      | Modality of the program that can assume one of the following values: <ul style="list-style-type: none"> <li>– 0 for gene deletion</li> <li>– 5 for gene tagging at the 5' terminus</li> <li>– 3 for gene tagging at the 3' terminus</li> </ul> | 0                                                                               |
| --enzyme_path   | List of enzymes that can be used for cloning and plasmid linearization prior to transformation                                                                                                                                                 | './Test_examples/raw_enzyme_list.txt'                                           |
| --FPG_paths     | List of fluorescent protein coding genes that should be considered during plasmid design                                                                                                                                                       | ['./Test_examples/CLB2_3p_labeling/mCherry_FPG.fsa',<br>'./Test_examples/CLB2_3 |

|                          |                                                                   |                                  |
|--------------------------|-------------------------------------------------------------------|----------------------------------|
|                          |                                                                   | p_labeling/ymNeonGreen_FPG.fsa'] |
| --popular_enzyme_path    | List of enzymes to be considered for adding around linker and FPG | -                                |
| --assembled_plasmid_name | Name of the output FASTA file                                     | -                                |

## Supplementary Note 2: Example of PIPOLine calls for gene deletion and gene tagging

Call used for gene deletion:

```
python.exe ./main.py
--backbone_path './Test_examples/pETUL_backbone.fsa'
--MCS_start_ind 1
--MCS_end_ind 108
--min_homology 70
--R 2
--Gene_path './Test_examples/GAL4_deletion/GAL4_pm_1000_gene.fsa'
--modality 0 --enzyme_path './Test_examples/raw_enzyme_list.txt'
```

Call used for gene tagging:

```
python.exe ./main.py
--backbone_path ./Test_examples/pETUL_backbone.fsa
--MCS_start_ind 1
--MCS_end_ind 108
--min_homology 70
--R 2
--Gene_path ./Test_examples/CLB2_3p_labeling/CLB2_pm_1000.fsa
--linker_path ./Test_examples/long_linker.fsa
--modality 5 --enzyme_path ./Test_examples/raw_enzyme_list.txt
--popular_enzyme_path ./Test_examples/Popular_enzymes.txt
--FPG_paths ./Test_examples/CLB2_3p_labeling/mCherry_FPG.fsa
./Test_examples/CLB2_3p_labeling/ymNeonGreen_FPG.fsa
./Test_examples/CLB2_3p_labeling/ymTq2_FPG.fsa
```

### Supplementary Note 3: Sequence of pETURALEU backbone

The following sequence is also supplied with annotations in gbk format in the **Supplementary Files**:

```
GGTACCGGGCCCCCCTCGAGGTCGACGGTATCGATAAGCTTGATATCGAATTCCTGCAGCCCGGGGATCCACTAGT
TCTAGAGCGGCCGCCACCGCGGTGGAGCTCCAGCTTTTGTCCCTTTAGTGAGGGTTAATTGCGCGCTTGCGGTAATC
ATGGTCATAGCTGTTTCCTGTGTGAAATTGTTATCCGCTCACAATTCCACACAACATAcGAGCCGGAAGCATAAAGTGT
AAAGCCTGGGGTGCCTAATGAGTGAGcTAACTCACATTAATTGCGTTGCGCTCACTGCCCGCTTTCAGTCGGGAAAC
CTGTCGTGCCAGCTGCATTAATGAATCGGCCAACGCGCGGGGAGAGGCGGTTTTCGTATTGGGCGCTCTCCGCTTCC
TCGCTCACTGACTCGCTGCGCTCGGTCGTTTCGGCTGCGGCGAGCGGTATCAGCTCAAAAGGCGGTAATACGGTTA
TCCACAGAATCAGGGGATAACGCAGGAAAGAACATGTGAGCAAAAGGCCAGCAAAAGGCCAGGAACCGTAAAAAG
GCCGCGTTGCTGGCGTTTTTTCATAGGCTCCGCCCCCTGACGAGCATCACAAAAATCGACGCTCAAGTCAGAGGTGG
CGAAACCCGACAGGACTATAAAGATACCAGGCGTTTCCCCCTGGAAGCTCCCTCGTGCGCTCTCCTGTTCCGACCCTGC
CGTTACCGGATACCTGTCCGCCTTTCTCCCTTCGGGAAGCGTGCGCTTTCTCATAGCTCACGCTGTAGGTATCTCAG
TTCGGTGTAGGTCGTTTCGCTCCAAGCTGGGCTGTGTGCACGAACCCCCCGTTTCAGCCCGACCGCTGCGCCTTATCCGG
TAACTATCGTCTTGAGTCCAACCCGGTAAGACACGACTTATCGCCACTGGCAGCAGCCACTGGTAACAGGATTAGCAG
AGCGAGGTATGTAGGCGGTGCTACAGAGTTCTTGAAGTGGTGGCCTAACTACGGCTACACTAGAAGGACAGTATTTG
GTATCTGCGCTCTGCTGAAGCCAGTTACCTTCGAAAAAGAGTTGGTAGCTCTTGATCCGGCAAAACAAACCACCGCTG
GTAGCGGTGGTTTTTTTGTTCGCAAGCAGCAGATTACGCGCAGAAAAAAGGATCTCAAGAAGATCCTTTGATCTTTT
CTACGGGGTCTGACGCTCAGTGGAACGAAAACTCACGTTAAGGGATTTTGGTCATGAGATTATCAAAAAGGATCTTCA
CCTAGATCCTTTTAAATTAATAAATGAAGTTTTAAATCAATCTAAAGTATATATGAGTAAACTTGGTCTGACAGTTACCA
ATGCTTAATCAGTGAGGCACCTATCTCAGCGATCTGTCTATTTTCGTTTCATCCATAGTTGCCTGACTCCCCGTCGTGTAGA
TAACTACGATACGGGAGGGCTTACCATCTGGCCCCAGTGCTGCAATGATACCGCGAGACCCACGCTCACCGGCTCCAG
ATTTATCAGCAATAAACCAGCCAGCCGGAAGGGCCGAGCGCAGAAGTGGTCTGCAACTTTATCCGCTCCATCCAGT
CTATTAATTGTTGCCGGGAAGCTAGAGTAAGTAGTTTCGCCAGTTAATAGTTTTCGCAACGTTGTTGCCATTGCTACAG
GCATCGTGGTGTACGCTCGTCGTTTGGTATGGCTTCATTTCAGCTCCGTTCCCAACGATCAAGGCGAGTTACATGATC
CCCCATGTTGTGCAAAAAAGCGGTTAGCTCCTTCGGTCTCCGATCGTTGTCAGAAGTAAGTTGGCCGCACTGTTATC
ACTCATGGTTATGGCAGCACTGCATAATTCTTACTGTATGCCATCCGTAAGATGCTTTTCTGTGACTGGTGAGTACT
CAACCAAGTCATTCTGAGAATAGTGTATGCGGCGACCGAGTTGCTCTTGCCCGGCGTCAATACGGGATAATACCGCGC
CACATAGCAGAACTTTAAAGTGCTCATCATTGGAAAACGTTCTTCGGGGCGAAAACTCTCAAGGATCTTACCGCTGT
TGAGATCCAGTTCGATGTAACCCACTCGTGACCCAACTGATCTTCAGCATCTTTTACTTTACCAGCGTTTCTGGGTGA
GCAAAAAACAGGAAGGCAAAATGCCGCAAAAAAGGGAATAAGGGCGACACGGAAATGTTGAATACTCATACTCTTCCT
TTTTCAATATTATTGAAGCATTTATCAGGGTTATTGTCTCATGAGCGGATACATATTTGAATGTATTTAGAAAAATAAAC
AAATAGGGGTTCCGCGCACATTTCCCCGAAAAGTGCCACCTGACGTCTAAGAAACCATTATTATCATGACATTAACTTA
TAAAAATAGGCGTATCACGAGGCCCTTCGTCTCGCGCGTTTCGGTGATGACGGTGAAAACCTTGACACATGCAGCT
CCcGGACTCTAATTTGTGAGTTTAGTATACATGCATTTACTTATAATACAGTTTTTTAGTTTTGCTGGCCGCATCTTCTCA
AATATGCTTCCAGCCTGCTTTTCTGTAACGTTACCCCTCTACCTTAGCATCCCTTCCCTTTGCAATAGTCCTCTTCCAA
CAATAATAATGTCAGATCCTGTAGAGACCACATCATCCACGGTTCTATACTGTTGACCCAATGCGTCTCCCTTGTCATCT
AAACCCACACCGGGTGTGATAATCAACCAATCGTAACCTTCATCTCTTCCACCCATGTCTCTTTGAGCAATAAAGCCGAT
AACAAAATCTTTGTGCTCTTCGCAATGTCAACAGTACCCTTAGTATATTCTCCAGTAGATAGGGAGCCCTTGATGAC
AATTCTGCTAACATCAAAAGGCCTCTAGGTTCTTTGTTACTTCTTCTGCCGCTGCTTCAAAACGCTAACAACTCTGG
GCCACCACACCGTGTGCATTGTAATGTCTGCCATTCTGCTATTCTGTATACACCCGAGAGTACTGCAATTTGACT
GTATTACCAATGTCAGCAAATTTTCTGTCTTCGAAGAGTAAAAAATTGTACTTGCGGATAATGCCTTAGCGGCTTAA
CTGTGCCCTCCATGGAAAAATCAGTCAAGATATCCACATGTGTTTTAGTAAACAAATTTTGGGACCTAATGCTTCAAC
TAACTCCAGTAATTCCTTGGTGGTACGAACATCCAATGAAGCACACAAGTTTGTTCGTTTTCGTGCATGATATTAAT
AGCTTGGCAGCAACAGGACTAGGATGAGTAGCAGCACGTTCTTATATGTAGCTTTCGACATGATTTATCTTCGTTTCC
TGCAGGTTTTTGTCTGTGCAAGTTGGGTTAAGAATACTGGGCAATTCATGTTTCTTCAACACTACATATGCGTATATAT
ACCAATCTAAGTCTGTGCTCCTTCTTCGTTCTTCTTCTGTTTCGGAGATTACCGAATCAAAAAAATTTCAAGGAAACCG
AAATCAAAAAAAGAATAAAAAAATGATGAATTGAAAAGTGGTATGGTGAAGTCTCAGTACTCCgGGAGACGG
TCACAGCTTGTCTGTAAGCGGATGCCGGGAGCAGACAAGCCCGTCAGGGCGCGTCAGCGGGTGTGGCGGGTGTGCG
GGGCTGGCTTAATATGCGGCATCAGAGCAGATTGTAAGTGTGAGAGTGCACCATATCGACTACGTCGTTAAGGCCGTTTC
TGACAGAGTAAAATTCTTGAGGGAACTTTCACCATATGGGAAATGGTTCAAGAAGGTATTGACTTAACTCCATCAA
ATGGTCAGGTCATTGAGTGTTTTTATTTGTTGATTTTTTTTTTTTAGAGAAAATCCTCCAATATATAAATTAGGAATC
ATAGTTTCATGATTTTCTGTTACACCTAACTTTTTGTGTGGTGCCCTCCTCCTGTCAATATTAATGTTAAAGTGAATTC
```

TTTTTCCTTATCACGTTGAGCCATTAGTATCAATTTGCTTACCTGTATTCTTTACATCCTCCTTTTTCTCCTTCTTGATAA  
 ATGTATGTAGATTGCGTATATAGTTTTCGTCTACCCTATGAACATATTCCATTTTGTAAATTCGTGTCGTTTCTATTATGAA  
 TTTCATTTATAAAGTTTATGTACAAATATCATAAAAAAGAGAATCTTTTTAAGCAAGGATTTTCTTAACCTCTTCGGCG  
 ACAGCATCACCGACTTCGGTGGTACTGTTGGAACCACCTAAATCACCAGTTCTGATACCTGCATCCAAAACCTTTTTAA  
 CTGCATCTTCAATGGCCTTACCTTCTTCAGGCAAGTTCAATGACAATTTCAACATCATTGCAGCAGACAAGATAGTGGC  
 GATAGGGTCAACCTTATTCTTTGGCAAATCTGGAGCAGAACCGTGGCATGGTTCGTACAAACCAAATGCGGTGTTCTT  
 GTCTGGCAAAGAGGCCAAGGACGCAGATGGCAACAAACCAAGGAACCTGGGATAACGGAGGCTTCATCGGAGATG  
 ATATCACCAAACATGTTGCTGGTGATTATAATACCATTTAGGTGGGTTGGGTTCTTAAGTAGGATCATGGCGGCAGAA  
 TCAATCAATTGATGTTGAACCTTCAATGTAGGGAATTCGTTCTTGATGGTTTTCTCCACAGTTTTTCTCCATAATCTTGA  
 AGAGGCCAAAAGATTAGCTTTATCCAAGGACCAAATAGGCAATGGTGGCTCATGTTGTAGGGCCATGAAAGCGGCCA  
 TTCTTGATGATTCTTGCATTCTGGAACGGTGTATTGTTCACTATCCCAAGCGACACCATCACCATCGTCTTCTTTCTCT  
 TACCAAAGTAAATACCTCCACTAATTCTCTGACAACAACGAAGTCAGTACCTTTAGCAAATTGTGGCTTGATTGGAGA  
 TAAGTCTAAAAGAGAGTCGGATGCAAAGTTACATGGTCTTAAGTTGGCGTACAATTGAAGTTCTTTACGGATTTTTAG  
 TAAACCTTGTTCAAGTCTAACACTACCGGTACCCATTTAGGACCACCCACAGCACCTAACAAAACGGCATCAGCCTTC  
 TTGGAGGCTTCCAGCGCTCATCTGGAAGTGGAACACCTGTAGCATCGATAGCAGCACCACCAATTAATGATTTTCG  
 AAATCGAATTGACATTGGAACGAACATCAGAAATAGCTTTAAGAACCTTAATGGCTTCGGCTGTGATTTCTTGACCAA  
 CGTGGTCACCTGGCAAAACGACGATCTTCTTAGGGGCGAGACATTAGAATGGTATATCCTTGAAATATATATATATAT  
 TGCTGAAATGTAAAAGGTAAGAAAAGTTAGAAAAGTAAGACGATTGCTAACCACCTATTGGAACCAATAGGTCCT  
 TAAATAATATTGTCAACTTCAAGTATTGTGATGCAAGCATTTAGTCATGAACGCTTCTCTATTCTATATGAAAAGCCGG  
 TTCCGGCGCTCTCACCTTCTTTTTCTCCCAATTTTTAGTTGAAAAAGGTATATGCGTCAGGCGACCTCTGAAATTAA  
 CAAAAAATTTCCAGTCATCGAATTTGATTCTGTGCGATAGCGCCCTGTGTGTTCTCGTTATGTTGAGGAAAAAATAA  
 TGTTGCTAAGAGATTGCAACTCTTGATCTTACGATACCTGAGTATCCACAGTTAACTGCGGTCAAGATATTTCTT  
 GAATCAGGCGCCTTAGACCGCTCGGCCAAACAACCAATTACTTGTGAGAAATAGAGTATAATTATCCTATAAATATA  
 ACGTTTTTGAACACACATGAACAAGGAAGTACAGGACAATTGATTTTGAAGAGAATGTGGATTTTGATGTAATTGTTG  
 GGATTCCATTTTAAATAAGGCAATAATATTAGGTATGTAGATATACTAGAAGTTCTCCTCGACCGGTCGATATGCGGTG  
 TGAAATACCGCACAGATGCGTAAGGAGAAAAATACCGCATCAGGAAATTGTAAgCGTTAATATTTTGTAAAAATTCGCG  
 TTAATTTTTTGTAAATCAGCTCATTTTTTAAACCAATAGGCCGAAATCGGCAAAATCCCTTATAAATCAAAGAATAGA  
 CCGAGATAGGGTTGAGTGTTGTTCCAGTTTGAACAAGAGTCCACTATTAAGAACGTGGACTCCAACGTCAAAGGG  
 CGAAAAACCGTCTATCAGGGCGATGGCCACTACGTGAACCATCACCTAATCAAGTTTTTTGGGGTCGAGGTGCCGT  
 AAAGCACTAAATCGGAACCTTAAAGGGAGCCCCGATTTAGAGCTTGACGGGGAAAGCCGGCGAACGTGGCGAGAA  
 AGGAAGGGAAGAAAGCGAAAGGAGCGGGCGCTAGGGCGCTGGCAAGTGTAGCGGTCACGCTGCGCGTAACCACCA  
 CACCCGCCGCGCTTAATGCGCCGCTACAGGGCGCGTCCATTCGCCATTCAGGCTGCGCAACTGTTGGGAAGGGCGAT  
 CGGTGCGGGCCTCTTCGCTATTACGCCAGCTGGCGAAAGGGGGATGTGCTGCAAGGCGATTAAAGTTGGGTAACGCCA  
 GGGTTTTCCAGTCACGACGTTGTAAACGACGGCCAGTGAGCGCGCGTAATACGACTCACTATAGGGCGAATTG

## Supplementary Note 4: Restriction enzymes and their cut sites

The following default list of restriction enzymes and cut sites is included in the PIPOLine package in file raw\_enzyme\_list.txt:

|        |          |            |             |          |          |
|--------|----------|------------|-------------|----------|----------|
| AatII  | Bme1580I | BstEII-HF® | HindIII     | NlaIII   | SbfI     |
| GACGTC | GKGCMC   | GGTNACC    | AAGCTT      | CATG     | CCTGCAGG |
| AccI   | BmgBI    | BstNI      | HindIII-HF® | NlaIV    | SbfI-HF® |
| GTMKAC | CACGTC   | CCWGG      | AAGCTT      | GGNNCC   | CCTGCAGG |
| Acc65I | Bmrl     | BstUI      | Hinfl       | NmeAIII  | Scal-HF® |
| GGTACC | ACTGGG   | CGCG       | GANTC       | GCCGAG   | AGTACT   |
| Acil   | BmtI     | BstXI      | HinP1I      | NotI     | ScrFI    |
| CCGC   | GCTAGC   | CCANNNNN   | GCGC        | GCGGCCGC | CCNGG    |
| AcII   | BmtI-HF® | BstYI      | HpaI        | NotI-HF® | SexAI    |
| AACGTT | GCTAGC   | RGATCY     | GTTAAC      | GCGGCCGC | ACCWGGT  |
| AcuI   | BpmI     | BstZ17I    | HpaII       | NruI     | SfaNI    |
| CTGAAG | CTGGAG   | GTATAC     | CCGG        | TCGCGA   | GCATC    |

|          |            |             |                     |                            |            |
|----------|------------|-------------|---------------------|----------------------------|------------|
| AfeI     | Bpu10I     | BstZ17I-HF® | HphI                | NruI-HF®                   | SfiI       |
| AGCGCT   | CCTNAGC    | GTATAC      | GGTGA               | TCGCGA                     | CTRYAG     |
| AflII    | BpuEI      | Bsu36I      | Hpy99I              | NsiI                       | SfiI       |
|          |            |             |                     |                            | GGCCNNNNNG |
| CTTAAG   | CTTGAG     | CCTNAGG     | CGWCG               | ATGCAT                     | GCC        |
| AflIII   | BsaI       | BtgI        | Hpy166II            | NsiI-HF®                   | SfoI       |
| ACRYGT   | GGTCTC     | CCRYGG      | GTNNAC              | ATGCAT                     | GGCGCC     |
| AgeI     | BsaI-HF®   | BtgZI       | Hpy188I             | NspI                       | SgrAI      |
| ACCGGT   | GGTCTC     | GCGATG      | TCNGA               | RCATGY                     | CRCCGGYG   |
| AgeI-HF® | BsaI-HF®v2 | BtsCI       | Hpy188III           | Nt.AlwI                    | SmaI       |
| ACCGGT   | GGTCTC     | GGATG       | TCNNGA              | GGATC                      | CCCGGG     |
| AhdI     | BsaAI      | BtsIMutI    | HpyAV               | Nt.BbvCI                   | SmlI       |
| GACNNNNN |            |             |                     |                            |            |
| GTC      | YACGTR     | CAGTG       | CCTTC               | CCTCAGC                    | CTYRAG     |
| AleI     | BsaBI      | BtsaI       | HpyCH4III           | Nt.BsmAI                   | SnaBI      |
| CACNNNNG | GATNNNN    |             |                     |                            |            |
| TG       | ATC        | GCA GTG     | ACNGT               | GTCTC                      | TACGTA     |
| AluI     | BsaHI      | Cac8I       | HpyCH4IV            | Nt.BspQI                   | SpeI       |
| AGCT     | GRCGYC     | GCNNGC      | ACGT                | GCTCTTC                    | ACTAGT     |
| AlwI     | BsaJI      | Clal        | HpyCH4V             | Nt.BstNBI                  | SpeI-HF®   |
| GGATC    | CCNNGG     | ATCGAT      | TGCA                | GAGTC                      | ACTAGT     |
| AlwNI    | BsaWI      | CspCI       | I-CeuI              | PacI                       | SphI       |
| CAGNNNCT |            | CAANNNNN    | TA ACTATAACGGTCCTAA |                            |            |
| G        | WCCGGW     | GTGG        | GGTAGCGA            | TTAATTAA                   | GCATGC     |
| Apal     | BsaXI      | CviAII      | I-SceI              | PaeR7I                     | SphI-HF®   |
|          | ACNNNNN    |             | TAGGGATAACAGGGTAA   |                            |            |
| GGGCCC   | CTCC       | CATG        | T                   | CTCGAG                     | GCATGC     |
| ApaLI    | BseRI      | CviKI-1     | KasI                | PaqCI                      | SrfI       |
| GTGCAC   | GAGGAG     | RGCY        | GGCGCC              | CACCTGC                    | GGCCGGGC   |
| ApeKI    | BseYI      | CviQI       | KpnI                | PciI                       | SspI       |
| GCWGC    | CCCAGC     | GTAC        | GGTACC              | ACATGT                     | AATATT     |
| ApoI     | BsgI       | DdeI        | KpnI-HF®            | PfiFI                      | SspI-HF®   |
| RAATTY   | GTGCAG     | CTNAG       | GGTACC              | GACNNNGTC                  | AATATT     |
| ApoI-HF® | BsiEI      | DpnI        | MboI                | PfiMI                      | StuI       |
| RAATTY   | CGRYCG     | GATC        | GATC                | CCANNNNNTGG                | AGGCCT     |
| AscI     | BsiHKAI    | DpnII       | MboII               | PhoI                       | StyI       |
| GGCGCGCC | GWGCWC     | GATC        | GAAGA               | GGCC                       | CCWWGG     |
| Asel     | BsiWI      | DraI        | MfeI                | PI-PspI                    | StyI-HF®   |
|          |            |             |                     | TGGCAAACAGCTATTATGGGTATTAT |            |
| ATTAAT   | CGTACG     | TTTAAA      | CAATTG              | GGGT                       | CCWWGG     |
| AsiSI    | BsiWI-HF®  | DraIII-HF®  | MfeI-HF®            | PI-SceI                    | StyD4I     |
|          |            | CACNNNGT    |                     | ATCTATGTCGGGTGCGGAGAAAGAG  |            |
| GCGATCGC | CGTACG     | G           | CAATTG              | GTAATGAAATGG               | CCNGG      |
| AvaI     | BsII       | DrdI        | MluI                | PleI                       | Swal       |
|          | CCNNNNN    | GACNNNNN    |                     |                            |            |
| CYCGRG   | NNGG       | NGTC        | ACGCGT              | GAGTC                      | ATTTAAAT   |
| AvaII    | BsmI       | EaeI        | MluI-HF®            | PluTI                      | TaqαI      |
| GGWCC    | GAATGC     | YGGCCR      | ACGCGT              | GGCGCC                     | TCGA       |
| AvrII    | BsmAI      | EagI        | MluCI               | PmeI                       | TfiI       |
| CCTAGG   | GTCTC      | CGGCCG      | AATT                | GTTTAAAC                   | GAWTC      |
| BaeI     | BsmBI      | EagI-HF®    | MlyI                | PmlI                       | TseI       |
| ACNNNNGT |            |             |                     |                            |            |
| AYC      | CGTCTC     | CGGCCG      | GAGTC               | CACGTG                     | GCWGC      |

|                          |                           |                   |             |           |                             |
|--------------------------|---------------------------|-------------------|-------------|-----------|-----------------------------|
| BaeGI                    | BsmBI-v2                  | EarI              | MmeI        | PpuMI     | Tsp45I                      |
| GKGC MC                  | CGTCTC                    | CTCTTC            | TCCRAC      | RGGWCCY   | GTSAC                       |
| BamHI                    | BsmFI                     | EciI              | MnII        | PshAI     | Tsp509I                     |
| GGATCC                   | GGGAC                     | GGCGGA            | CCTC        | GACNNNGTC | AATT                        |
| BamHI-HF®                | BsoBI                     | Eco53kI           | MscI        | PsiI      | TspMI                       |
| GGATCC                   | CYCGRG                    | GAGCTC            | TGGCCA      | TTATAA    | CCCGGG                      |
| BanI                     | Bsp1286I                  | EcoNI<br>CCTNNNNN | MseI        | PspGI     | TspRI                       |
| GGYRCC                   | GDGCHC                    | AGG               | TTAA        | CCWGG     | CASTG                       |
| BanII                    | BspCNI                    | EcoO109I          | MslI        | PspOMI    | Tth111I                     |
| GRG CYC                  | CTCAG                     | RGGNCCY           | CAYNNNNRTG  | GGGCCC    | GACNNNGTC                   |
| BbsI                     | BspDI                     | EcoP15I           | MspI        | PspXI     | XbaI                        |
| GAAGAC                   | ATCGAT                    | CAGCAG            | CCGG        | VCTCGAGB  | TCTAGA                      |
| BbsI-HF®                 | BspEI                     | EcoRI             | MspA1I      | PstI      | XcmI<br>CCANNNNNNN<br>NNTGG |
| GAAGAC                   | TCCGGA                    | GAATTC            | CMGCKG      | CTGCAG    | XhoI                        |
| BbvI                     | BspHI                     | EcoRI-HF®         | MwoI        | PstI-HF®  | CTCGAG                      |
| GCAGC                    | TCATGA                    | GAATTC            | GCNNNNNNNGC | CTGCAG    | XmaI                        |
| BbvCI                    | BspMI                     | EcoRV             | NaeI        | PvuI      | CCCGGG                      |
| CCTCAGC                  | ACCTGC                    | GATATC            | GCCGGC      | CGATCG    | XmnI                        |
| BccI                     | BspQI                     | EcoRV-HF®         | NarI        | PvuI-HF®  | GAANNNTTC                   |
| CCATC                    | GCTCTTC                   | GATATC            | GGCGCC      | CGATCG    | ZraI                        |
| BceAI                    | BsrI                      | Esp3I             | Nb.BbvCI    | PvuII     | GACGTC                      |
| ACGGC                    | ACTGG                     | CGTCTC            | CCTCAGC     | CAGCTG    |                             |
| BcgI<br>CGANNNNN<br>NTGC | BsrBI                     | FatI              | Nb.BsmI     | PvuII-HF® |                             |
|                          | CCGCTC                    | CATG              | GAATGC      | CAGCTG    |                             |
| BciVI                    | BsrDI                     | FauI              | Nb.BsrDI    | RsaI      |                             |
| GTATCC                   | GCAATG                    | CCCGC             | GCAATG      | GTAC      |                             |
| BclI                     | BsrFI                     | Fnu4HI            | Nb.BssSI    | RsrII     |                             |
| TGATCA                   | RCCGGY                    | GCNGC             | CACGAG      | CGGWCCG   |                             |
| BclI-HF®                 | BsrGI                     | FokI              | Nb.BtsI     | SacI      |                             |
| TGATCA                   | TGTACA                    | GGATG             | GCAGTG      | GAGCTC    |                             |
| BcoDI                    | BsrGI-HF®                 | FseI              | NciI        | SacI-HF®  |                             |
| GTCTC                    | TGTACA                    | GGCCGGCC          | CCSGG       | GAGCTC    |                             |
| BfaI                     | BssHII                    | FspI              | NcoI        | SacII     |                             |
| CTAG                     | GCGCGC                    | TGCGCA            | CCATGG      | CCGCGG    |                             |
| BfuAI                    | BssKI                     | HaeII             | NcoI-HF®    | SalI      |                             |
| ACCTGC                   | CCNGG                     | RGCGCY            | CCATGG      | GTCGAC    |                             |
| BfuCI                    | BssSαI                    | HaeIII            | NdeI        | SalI-HF®  |                             |
| GATC                     | CACGAG                    | GGCC              | CATATG      | GTCGAC    |                             |
| BglI<br>GCCNNNNN<br>GGC  | BstAPI<br>GCANNNN<br>NTGC | HgaI              | NgoMIV      | SapI      |                             |
|                          |                           | GACGC             | GCCGGC      | GCTCTTC   |                             |
| BglII                    | BstBI                     | HhaI              | NheI        | Sau3AI    |                             |
| AGATCT                   | TTCGAA                    | GCGC              | GCTAGC      | GATC      |                             |
| BlpI                     | BstEII                    | HincII            | NheI-HF®    | Sau96I    |                             |
| GCTNAGC                  | GGTNACC                   | GTyrAC            | GCTAGC      | GGNCC     |                             |

### Supplementary Note 5: Default linker used for tagging

CCGCGGGGTGCTTCTGTTGGTGCTTCTGTTTCTGTTGGTCCGCGGTGGAGCTCAATG

### Supplementary Note 6: Sequence of yeast-optimized mScarletI (ymScarletI) from ref. (Botman et al., 2019) with restriction sites for frequently-used restriction enzymes removed

The following sequence is also supplied with annotations in gbk format in the **Supplementary Files**:

ATGGTTAGTAAAGGTGAAGCTGTTATAAAAGAATTTATGAGGTTTAAAGTTCATATGGAAGGTTCAATGAATGGTCAT  
GAATTTGAAATTGAAGGTGAAGGTGAAGGTAGACCATATGAAGGTACACAAACTGCTAAATTGAAAGTTACTAAAGG  
TGGTCCATTACCATTTTCTTGGGATATTTGTCTCCACAATTCATGTATGGTTCAAGAGCTTTTATTAAGCATCCTGCTG  
ATATTCCAGATTATTATAAAACAATCTTTTCTGAAGGTTTTAAATGGGAAAGAGTTATGAATTTTGAAGATGGTGGTGC  
TGTTACTGTTACACAAGATACTTCTTTGGAAGATGGTACTTTAATCTATAAAAGTTAAATTGAGAGGTACTAATTTTCCAC  
CAGACGGTCCAGTTATGCAAAAGAAAACCTATGGGTTGGGAAGCATCTACTGAAAGATTGTATCCTGAAGATGGTGT  
TTGAAAGGAGACATTAAGATGGCTTTGAGATTGAAAGATGGTGGTAGATACCTGGCCGACTTCAAGACCACCTATAA  
AGCTAAAAAACAGTTCAAATGCCAGGTGCATATAATGTTGATAGAAAGTTAGATATAACGTCGCATAACGAGGACTA  
TACTGTAGTTGAACAATATGAACGTAGTGAAGGTAGACATAGTACCGGAGGAATGGATGAATTGTATAAATAA

### Supplementary Table 1: Strains used in the study

| Strain name | Genotype                                  | Source     |
|-------------|-------------------------------------------|------------|
| yVG2873     | <i>W303 MATa WHI5::pVG264::URA3, LEU2</i> | This study |
| yVG2874     | <i>W303 MATa WHI5::pVG265::URA3, LEU2</i> | This study |
| yVG2875     | <i>W303 MATa WHI5::pVG266::URA3, LEU2</i> | This study |
| yVG2876     | <i>W303 MATa WHI5::pVG267::URA3, LEU2</i> | This study |
| yVG2877     | <i>W303 MATa WHI5::pVG268::URA3, LEU2</i> | This study |
| yVG2878     | <i>W303 MATa HTB2::pVG288::URA3, LEU2</i> | This study |
| yVG2879     | <i>W303 MATa HTB2::pVG289::URA3, LEU2</i> | This study |
| yVG2880     | <i>W303 MATa HTB2::pVG290::URA3, LEU2</i> | This study |
| yVG2881     | <i>W303 MATa HTB2::pVG291::URA3, LEU2</i> | This study |

### Supplementary Table 2: Plasmids used in the study

The annotated sequences for the plasmids below are included as gbk files in the **Supplementary Files**:

| Plasmid name | Description                                                                   | Yeast selection marker | Bacterial selection marker | Source of the plasmid |
|--------------|-------------------------------------------------------------------------------|------------------------|----------------------------|-----------------------|
| pETURALEU    | Empty backbone containing both <i>URA3</i> and <i>LEU2</i> selectable markers | <i>URA3, LEU2</i>      | <i>Amp</i>                 | This study            |
| pVG254       | Whi5 marking plasmid using ymScarletI and $R_{\text{homo}} = 0.5$             | <i>URA3, LEU2</i>      | <i>Amp</i>                 | This study            |
| pVG265       | Whi5 marking plasmid using ymScarletI and $R_{\text{homo}} = 1$               | <i>URA3, LEU2</i>      | <i>Amp</i>                 | This study            |
| pVG266       | Whi5 marking plasmid using ymScarletI and $R_{\text{homo}} = 1.5$             | <i>URA3, LEU2</i>      | <i>Amp</i>                 | This study            |
| pVG267       | Whi5 marking plasmid using ymScarletI and $R_{\text{homo}} = 2$               | <i>URA3, LEU2</i>      | <i>Amp</i>                 | This study            |
| pVG268       | Whi5 marking plasmid using ymScarletI with $R_{\text{homo}} = 4$              | <i>URA3, LEU2</i>      | <i>Amp</i>                 | This study            |



|        |                                                                   |                   |            |            |
|--------|-------------------------------------------------------------------|-------------------|------------|------------|
| pVG288 | Htb2 marking plasmid using ymScarletI and $R_{\text{homo}} = 0.5$ | <i>URA3, LEU2</i> | <i>Amp</i> | This study |
| pVG289 | Htb2 marking plasmid using ymScarletI and $R_{\text{homo}} = 1$   | <i>URA3, LEU2</i> | <i>Amp</i> | This study |
| pVG290 | Htb2 marking plasmid using ymScarletI and $R_{\text{homo}} = 1.5$ | <i>URA3, LEU2</i> | <i>Amp</i> | This study |
| pVG291 | Htb2 marking plasmid using ymScarletI and $R_{\text{homo}} = 2$   | <i>URA3, LEU2</i> | <i>Amp</i> | This study |

Supplementary Table 3: Number of analyzed colonies for Fig. 4

| Gene        | $R_{\text{homo}}$ | Number of colonies analyzed in desired versus undesired pop-out | Method for analysis     |
|-------------|-------------------|-----------------------------------------------------------------|-------------------------|
| <i>HTB2</i> | 0.5               | 100                                                             | Fluorescence microscopy |
| <i>HTB2</i> | 1                 | 95                                                              | Fluorescence microscopy |
| <i>HTB2</i> | 1.5               | 105                                                             | Fluorescence microscopy |
| <i>HTB2</i> | 2                 | 100                                                             | Fluorescence microscopy |
| <i>WHI5</i> | 0.5               | 44                                                              | PCR                     |
| <i>WHI5</i> | 1                 | 18                                                              | PCR                     |
| <i>WHI5</i> | 1.5               | 38                                                              | PCR                     |
| <i>WHI5</i> | 2                 | 28                                                              | PCR                     |
| <i>WHI5</i> | 4                 | 42                                                              | PCR                     |
